# Supplementary material for: Insights into the human mesenchymal stromal/stem cell identity through integrative transcriptomic profiling
Source: BMC Genomics. 2016 Nov 21;17:944. doi: 10.1186/s12864-016-3230-0 (PMC5117530; doi:10.1186/s12864-016-3230-0)
Supplement: Additional file 6: — Output summary of the meta-analysis differential expression. Notations: BM-MSC = Bone Marrow MSC; HPC = Hematopoietic progenitor cells; FIB = fibroblasts; OSTB = Osteoblasts; dOST = MSC in-vitro derived osteoblasts; stOST = stimulated osteoblasts. The ”n” refers to the number of microarrays. (XLSX 39 kb) [file 12864_2016_3230_MOESM6_ESM.xlsx]

## Sheet: Additional File 6
Differential Expression Contrasts	CELL Type I (n)	CELL Type II (n)	Median of nDEgenes (in 100 runs)	number of Iters per run	Selected DE-genes	UP-Regulated in Type I	DOWN-Regulated in Type I
1	BM-MSC (50)	HSPC (10)	4878	150	4748	2124	2624
2	BM-MSC (50)	FIB (11)	426	50	401	207	194
3	BM-MSC (50)	OSTB (13)	3	20	–	–	–
4A	BM-MSC (50)	dOST (12)	38	100	–	–	–
4B	dOST (12)	OSTB (13)	1238	100	–	–	–
4C	OSTB (13)	stOST (23)	0	100	–	–	–
The total set of samples used in these comparisons was 119, that come from the GEO datasets indicated in Additional File 4.
